# Supplementary material for: Blowing-inspired ex situ preparation of ultrathin hydrogel coatings for visibly monitoring humidity and alkaline gas
Source: Royal Society of Chemistry journal article supplement (doi:10.1039/d3nr02821f), 2023-01-01
Supplement: d3nr02821f6.pdf [file d3nr02821f6.pdf]

## Supporting Information

# Blowing-Inspired *Ex-Situ* Preparation of Ultrathin Hydrogel Coatings for Visibly Monitoring Humidity and Alkaline Gas

*Xiao He,<sup>1</sup> Ruijie Yang,<sup>1</sup> Chaochen Xu,<sup>2</sup> Ziqian Zhao,<sup>3</sup> Y. Frank Cheng,<sup>2</sup> Philip Egberts,<sup>2</sup> Hongbo Zeng,<sup>3\*</sup> and Qingye Lu<sup>1\*</sup>*

<sup>1</sup> Department of Chemical and Petroleum Engineering, University of Calgary, Calgary, Alberta T2N 1N4, Canada

<sup>2</sup> Department of Mechanical and Manufacturing Engineering, University of Calgary, Calgary, Alberta T2N 1N4, Canada

<sup>3</sup> Department of Chemical & Materials Engineering, University of Alberta, Edmonton, Alberta T6G 1H9, Canada

\*Corresponding author: E-mail: [hongbo.zeng@ualberta.ca](mailto:hongbo.zeng@ualberta.ca) (H. Zeng); [qingye.lu@ucalgary.ca](mailto:qingye.lu@ucalgary.ca)

(Q. Lu)

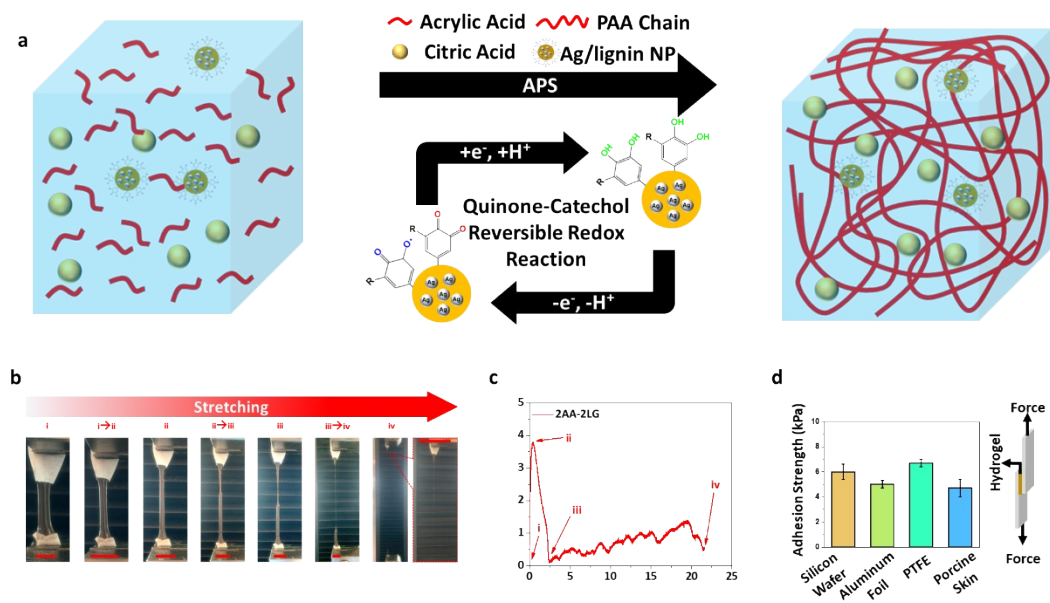

**Fig. S1.** Gelation mechanism and characterization of PAA hydrogel based on the quinone/semiquinone-catechol redox system by Ag/lignin NPs. a) Schematic illustration of gelation process of PAA hydrogel. b) Necking behavior of 2AA-2LG hydrogel during the stretching process. c) Tensile stress-strain curve of 2AA-2LG hydrogel during stretching, the peak of the curve indicates the presence of necking behavior. d) Adhesion strength of 2AA-2LG hydrogel on different substrates (silicon wafer:  $6.0 \pm 0.6$  kPa, aluminum foil:  $5.0 \pm 0.3$  kPa, PTFE:  $6.7 \pm 0.3$  kPa and porcine skin:  $4.7 \pm 0.7$  kPa). The scale bar in Fig. S1b is 1 cm.

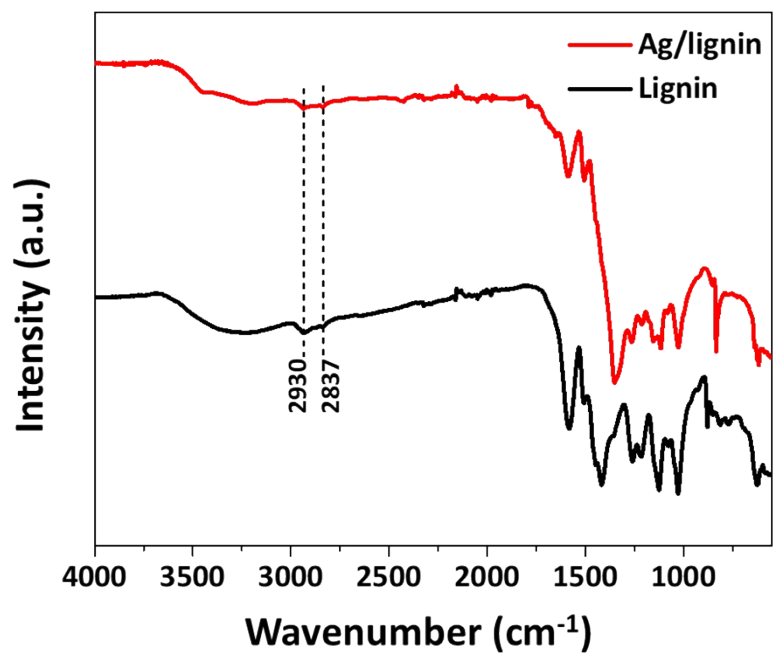

**Fig. S2.** FT-IR spectra of Ag/lignin NPs and lignin. The peak at 2837  $\text{cm}^{-1}$  stands for  $-\text{CH}_3$  in the methoxy groups and the peak at 2930  $\text{cm}^{-1}$  is assigned to methyl and methylene groups,<sup>1</sup> suggesting the partial hydrophobicity of lignin and Ag/lignin NP surfaces.

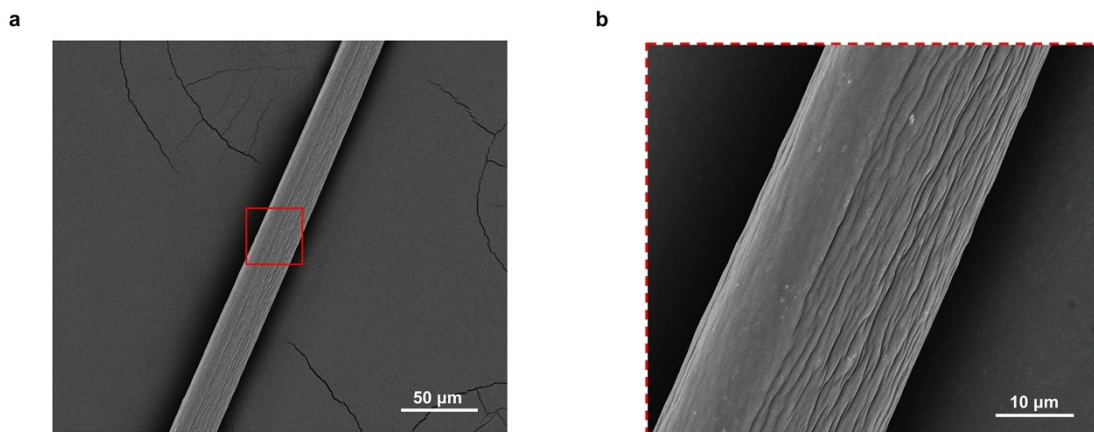

**Fig. S3.** SEM image of a hydrogel fiber generated by extending the 2AA-2LG hydrogel after necking propagation. Fig. S3b is the enlarged view of area shown in the read box in Fig. S3a.

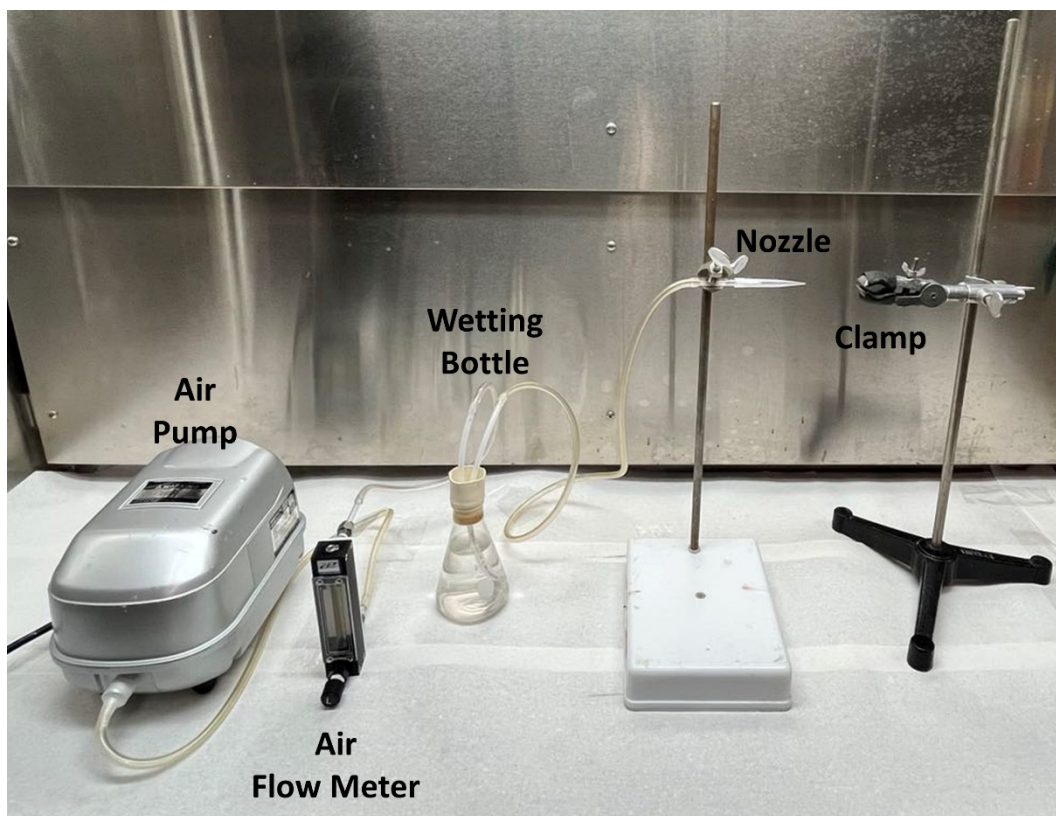

**Fig. S4.** House-built apparatus to fabricate hydrogel coatings using bubble blowing strategy.

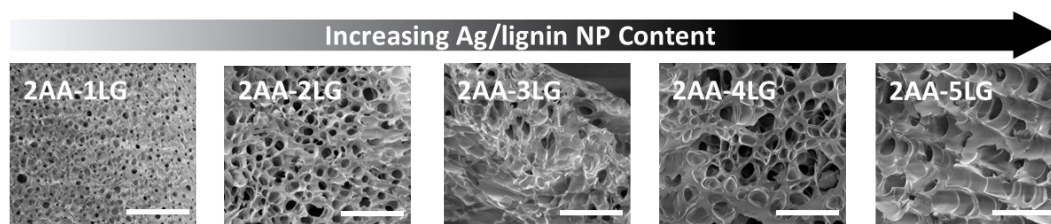

**Fig. S5.** Porous structures of hydrogels with different contents of Ag/lignin particles by SEM imaging, indicating that a higher content of Ag/lignin NPs resulted in a less compact network and larger pore sizes. The scale bars are 100 μm.

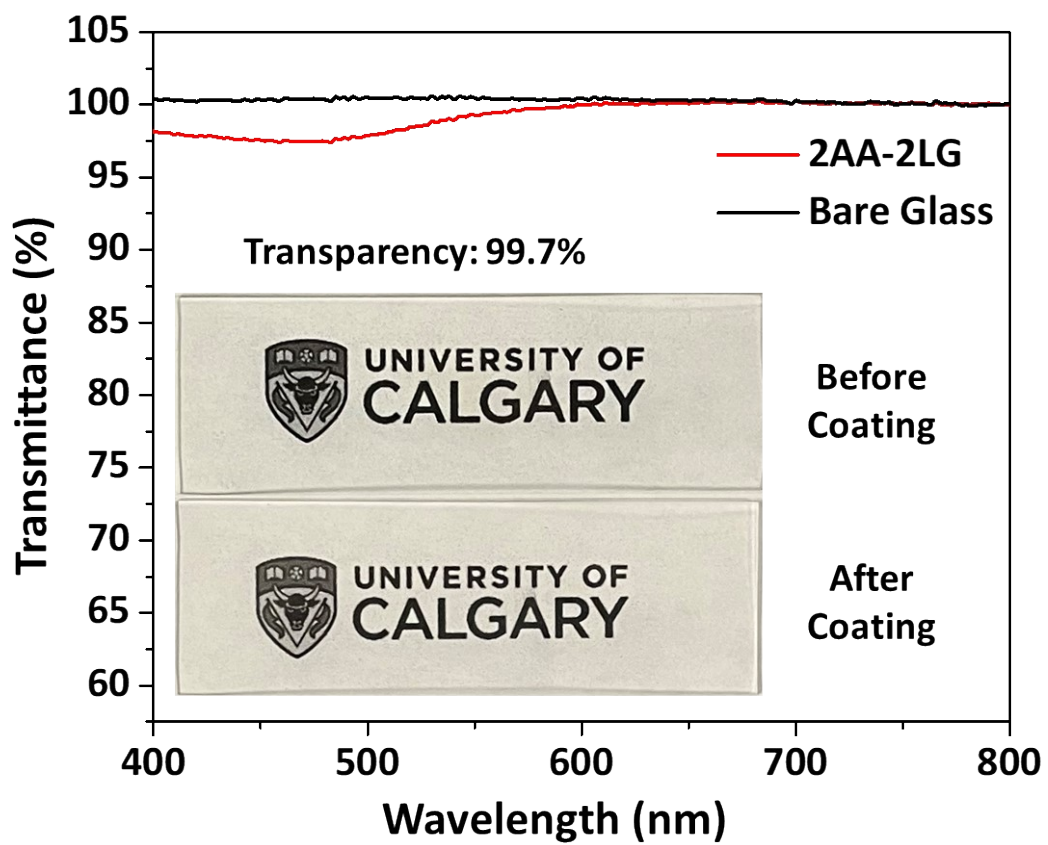

Fig. S6. High transparency of an ultrathin hydrogel coating on a glass slide.

Half-wave loss happens when light enters from air to hydrogel ( $n_1 < n_2$ ) and does not happen when light enters from hydrogel to  $\text{SiO}_2$  layer ( $n_2 > n_3$ ).

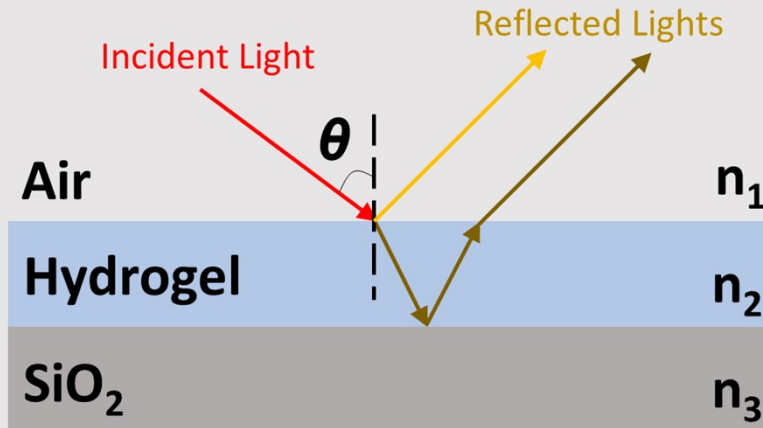

**Fig. S7.** Schematic interference of the two reflected light from the air-hydrogel coating and hydrogel coating-SiO<sub>2</sub>.  $n_1$ ,  $n_2$  and  $n_3$  are the refractive indices of air, hydrogel and SiO<sub>2</sub>, respectively.  $\theta$  is the incident angle of light.



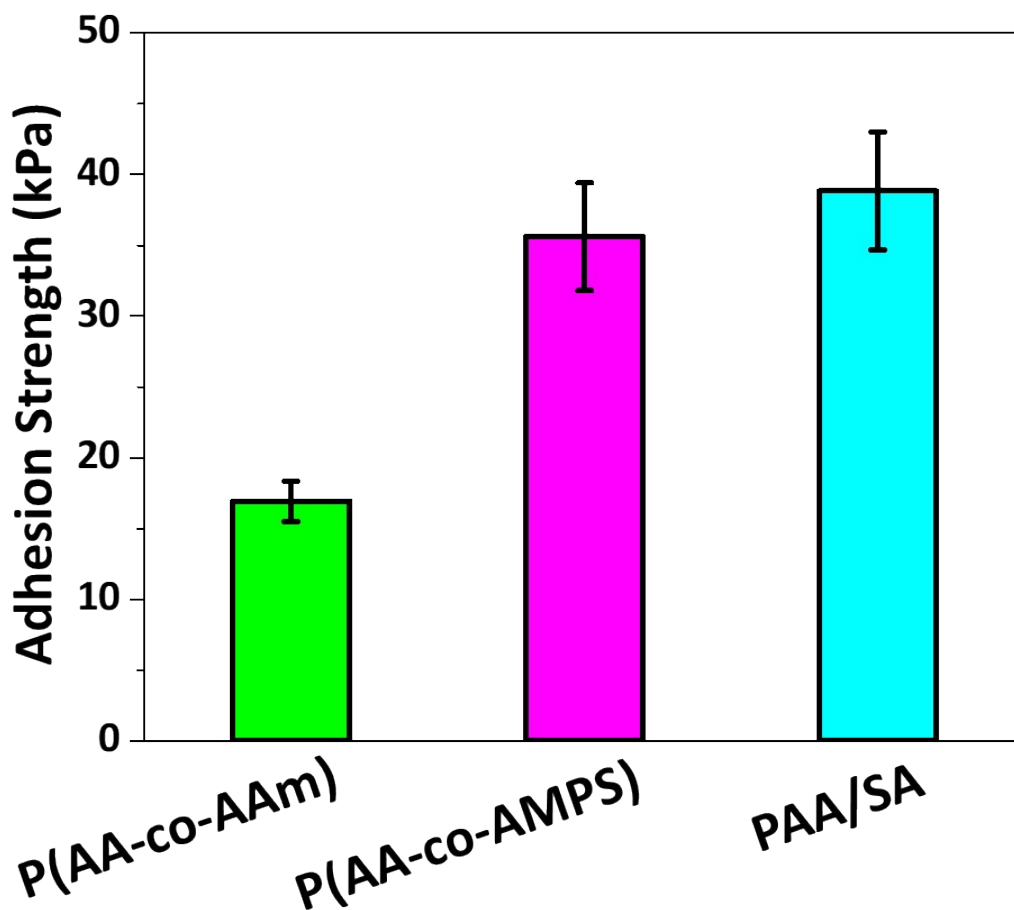

**Fig. S8.** Adhesive properties of PAA/SA double network hydrogel, P(AA-co-AAm) hydrogel and P(AA-co-AMPS) hydrogel gelled *via* dynamic quinone-catechol redox system by Ag/lignin NPs onto silicon wafer, favoring the transferring of the hydrogel films to the wafer surface (P(AA-co-AAm):  $16.9 \pm 1.4$  kPa, P(AA-co-AMPS):  $35.6 \pm 3.8$  kPa, PAA/SA:  $38.8 \pm 4.1$  kPa).

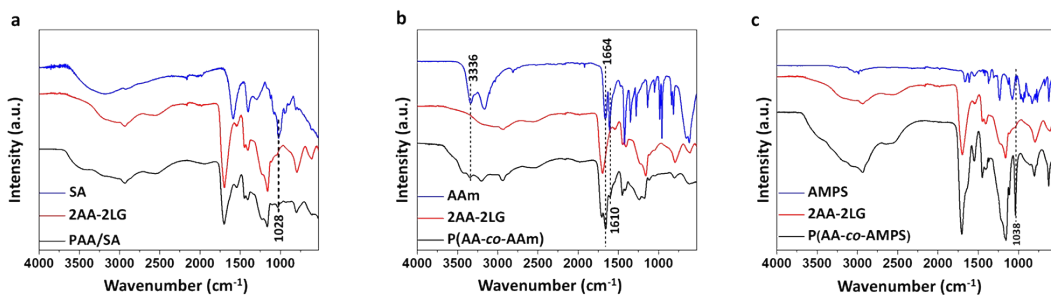

**Fig. S9.** FT-IR spectra of different coatings fabricated using bubble blowing strategy using a) PAA/SA DN hydrogel, b) P(AA-co-AAm) SN hydrogel and c) P(AA-co-AMPS) SN hydrogel on silicon wafers. Fig. a: peak at  $1028\text{ cm}^{-1}$  represents the stretching vibration of  $\text{-C-OH}$  of sodium alginate;<sup>2</sup> Fig. b: peaks at  $3336\text{ cm}^{-1}$ ,  $1664\text{ cm}^{-1}$ , and  $1610\text{ cm}^{-1}$  represents the N-H stretching, C=O stretching and C-C stretching of acrylamide, respectively;<sup>3</sup> Fig. c: peak at  $1038\text{ cm}^{-1}$  represents the sulfonic groups of AMPS.<sup>4</sup>

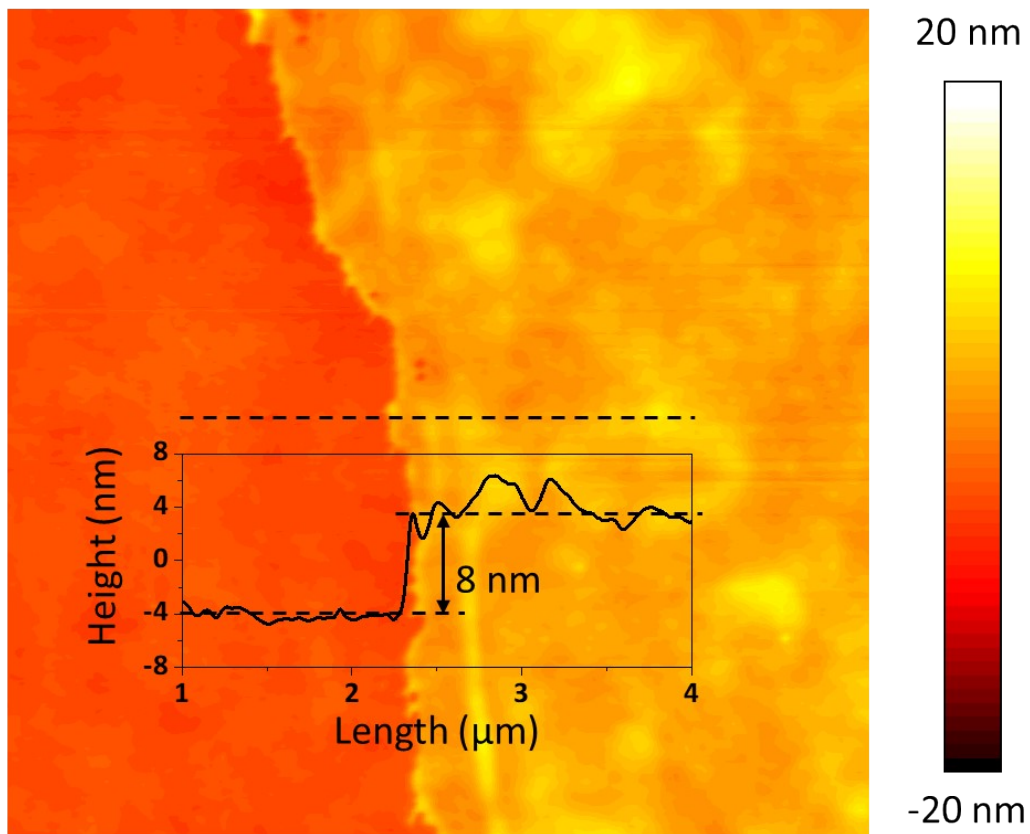

**Fig. S10.** AFM image ( $5 \times 5 \mu\text{m}$ ) of edge area of the PAA/SA hydrogel coating.

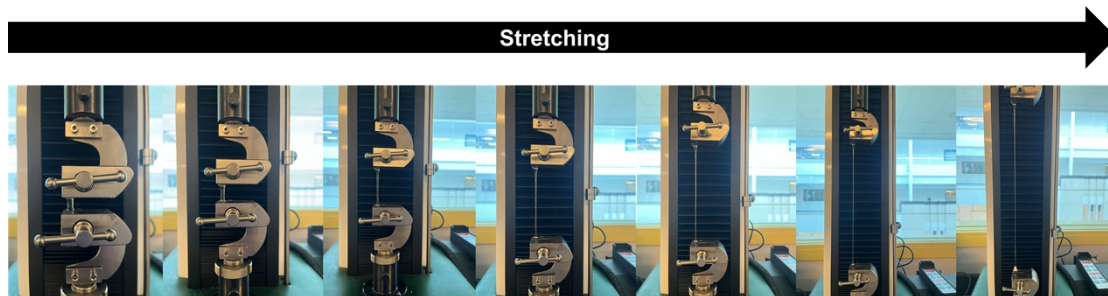

**Fig. S11.** Stretching pure PAA hydrogel prepared using APS under the external stimulus of thermal and no obvious necking behavior was observed.

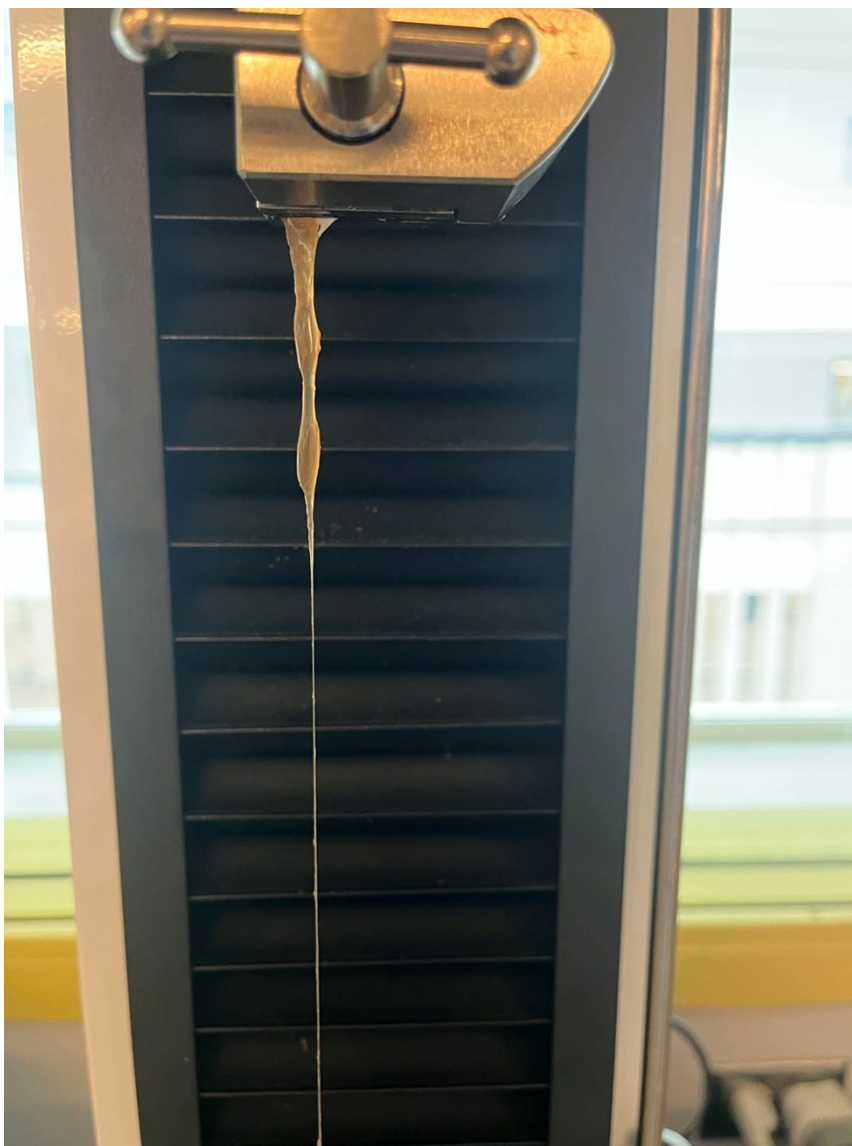

**Fig. S12.** Necking propagation of PAA+ILG hydrogel containing a proper amount of lignin particles, indicating that the addition of lignin particles would lead to the necking behavior of hydrogel.

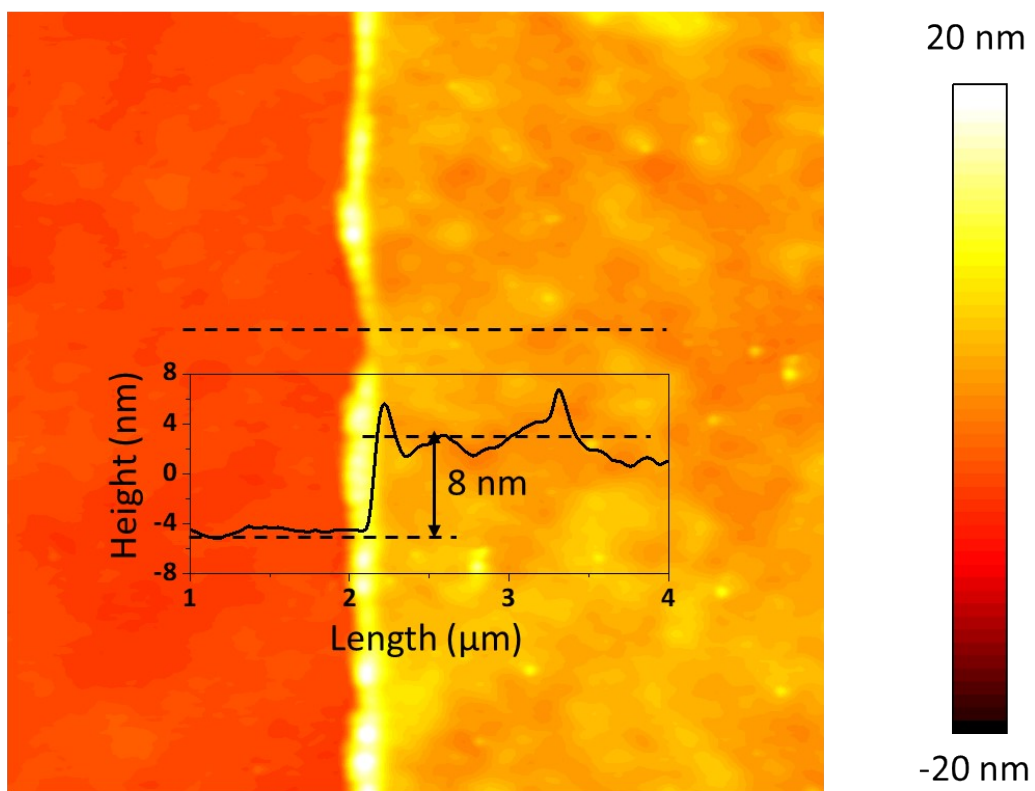

**Fig. S13.** AFM image ( $5 \times 5 \mu\text{m}$ ) of edge area of the PAA+3LG hydrogel coating.

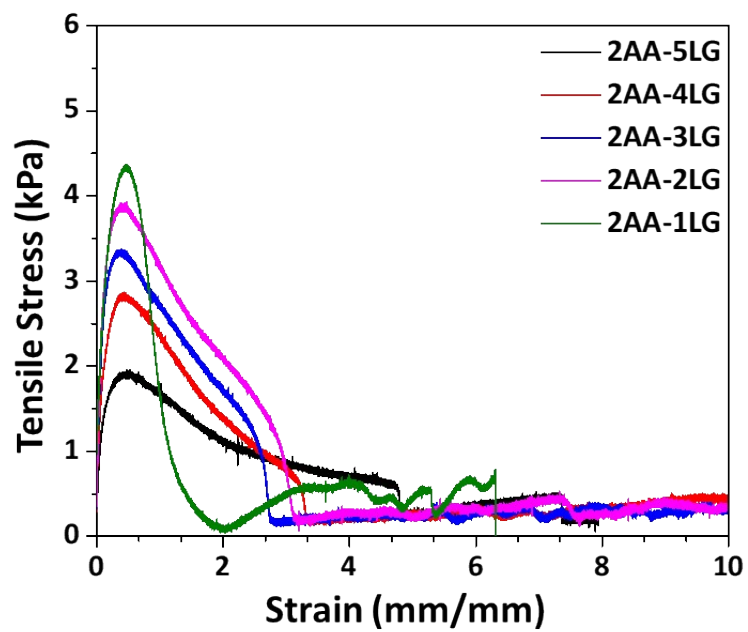

**Fig. S14.** The tensile stress-strain curves of hydrogels containing different contents of Ag/lignin NPs.

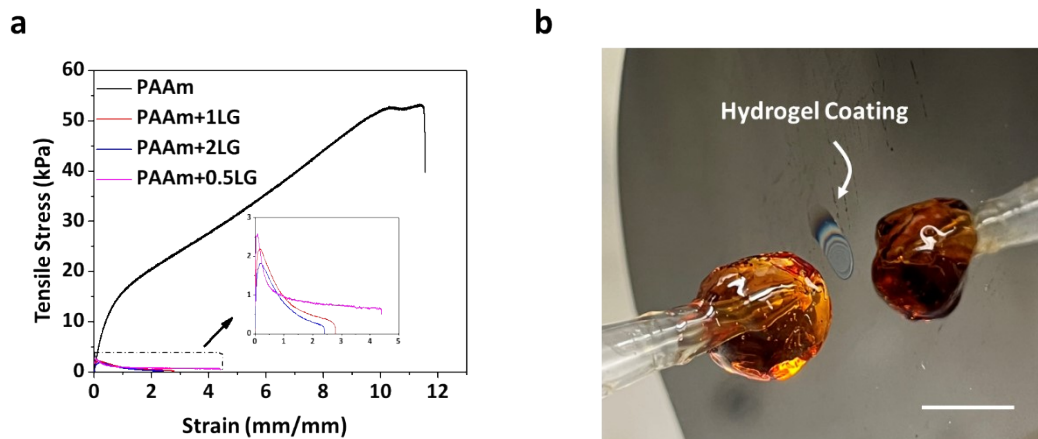

**Fig. S15.** a) Mechanical properties of PAAm hydrogels with or without the presence of lignin particles, demonstrating that the addition of lignin particles into hydrogel could lead to obvious necking behavior. b) A hydrogel coating on silicon wafer prepared using PAAm+0.5 LG hydrogel *via* bubble blowing strategy, the near transparent part of coating near the edge area suggests the ultrathin thickness. The scale bars are 1 cm.



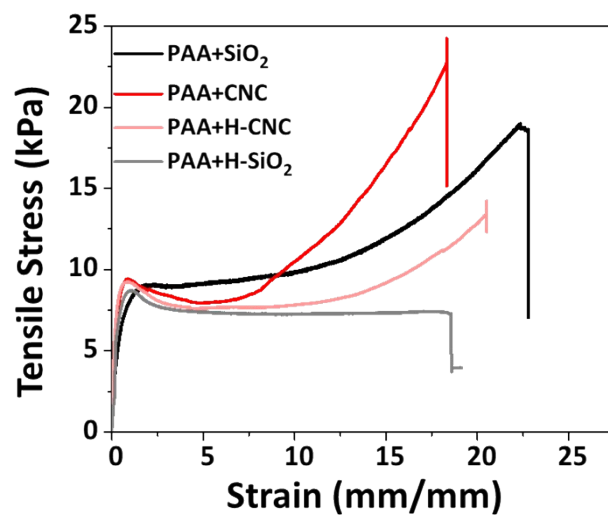

**Fig. S16.** Mechanical properties of PAA hydrogels containing hydrophilic particles (SiO<sub>2</sub> and CNC) or hydrophobized particles (H-SiO<sub>2</sub> and H-CNC).

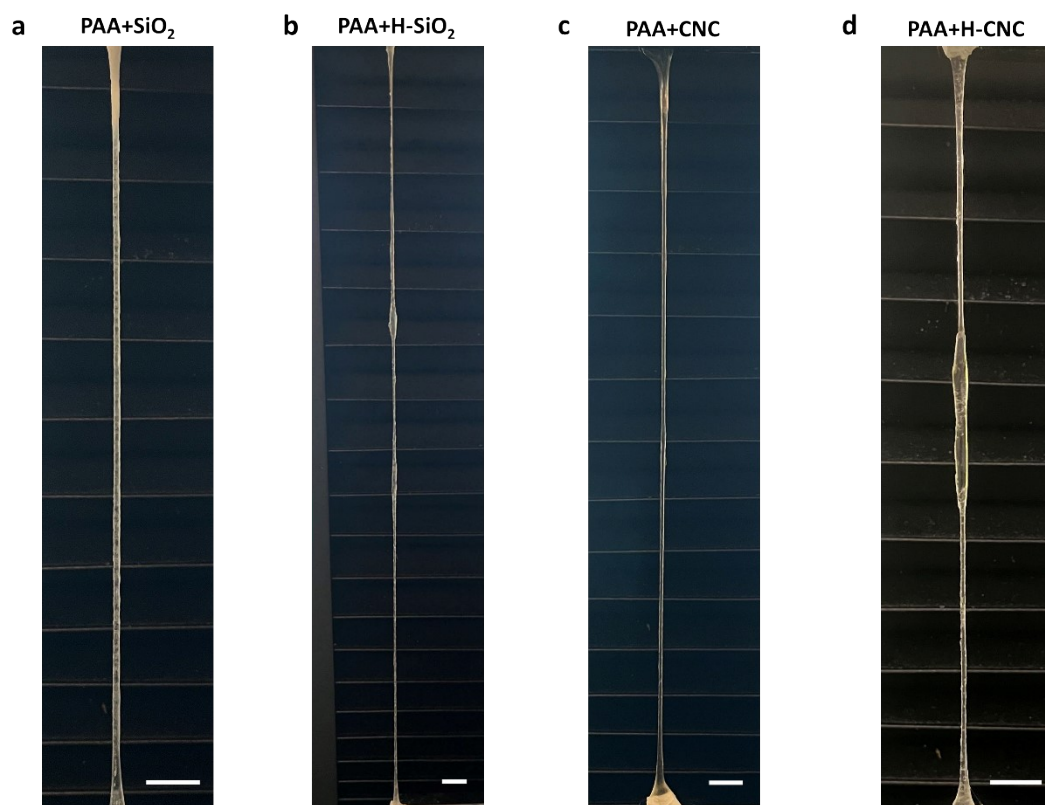

**Fig. S17.** Stretching process of a) PAA+SiO<sub>2</sub> NP hydrogel, b) PAA+H-SiO<sub>2</sub> NP hydrogel, c) PAA+CNC hydrogel and d) PAA+H-CNC hydrogel, demonstrating the benefit of hydrophobic particles on the mobility of polymer chains and resulting necking behavior during stretching process. The scale bars are 1 cm.

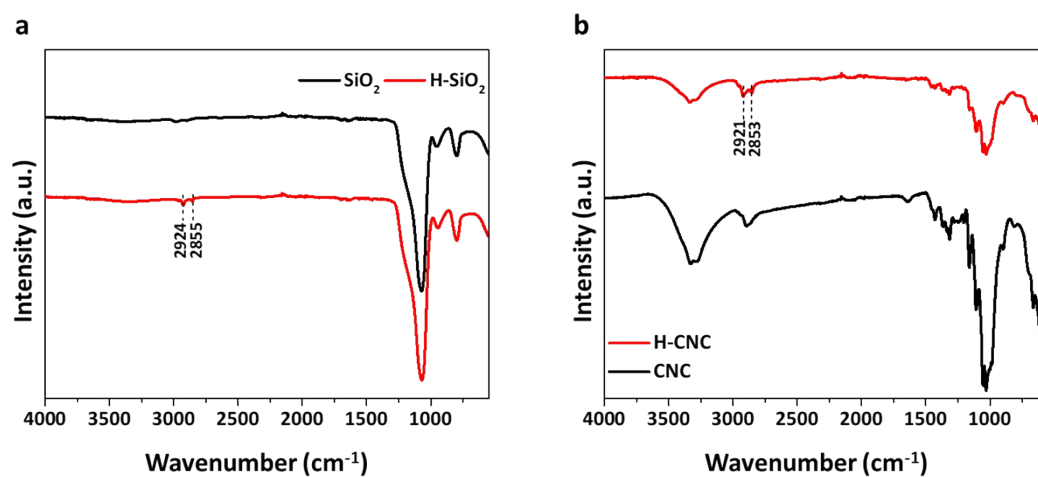

**Fig. S18.** FT-IR spectrum of a) SiO<sub>2</sub> and b) CNC with or without hydrophobization. The peaks at ~2924 and ~2855 cm<sup>-1</sup> of H-SiO<sub>2</sub>, and ~2921 and 2853 cm<sup>-1</sup> stand for the C–H asymmetric and symmetric stretching vibration in all hydrocarbon constituents,<sup>5</sup> suggesting the grafting of hydrophobic functional groups.

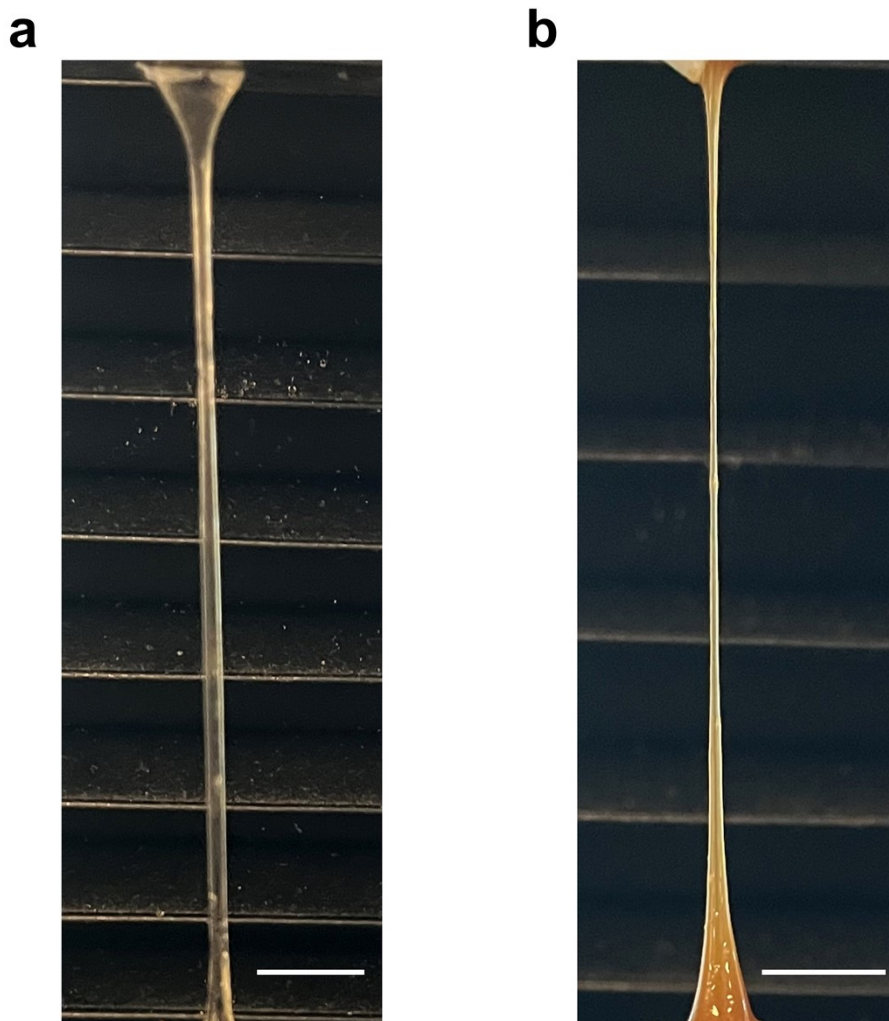

**Fig. S19.** Stretching of a) PAA+0.001MBAA hydrogel and b) PAA+0.001MBAA+3LG, indicating the necking behavior of the hydrogel after adding lignin particles. The scale bars are 1 cm.

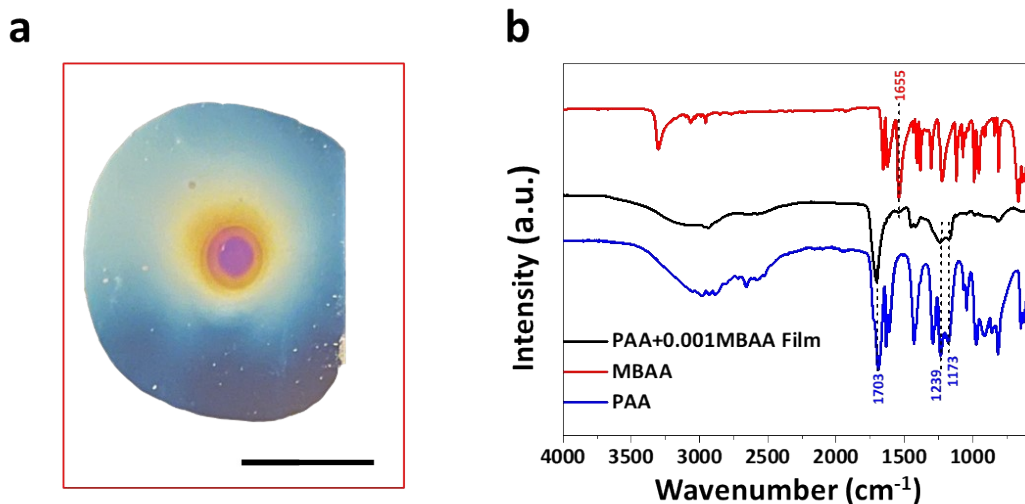

**Fig. S20.** a) Hydrogel coating fabricated using PAA+0.001MBAA hydrogel and b) FT-IR spectra of ultrathin hydrogel film fabricated using PAA+0.001MBAA hydrogel *via* blowing strategy. MBAA: 1655 cm<sup>-1</sup>: C=O stretching; PAA: 1703 cm<sup>-1</sup>: C-O vibration, 1239 cm<sup>-1</sup>: C-O stretching coupled with O-H in-plane bending mode, 1173 cm<sup>-1</sup>: C-O stretching of neighboring carboxyl groups. The scale bar is 1 cm.

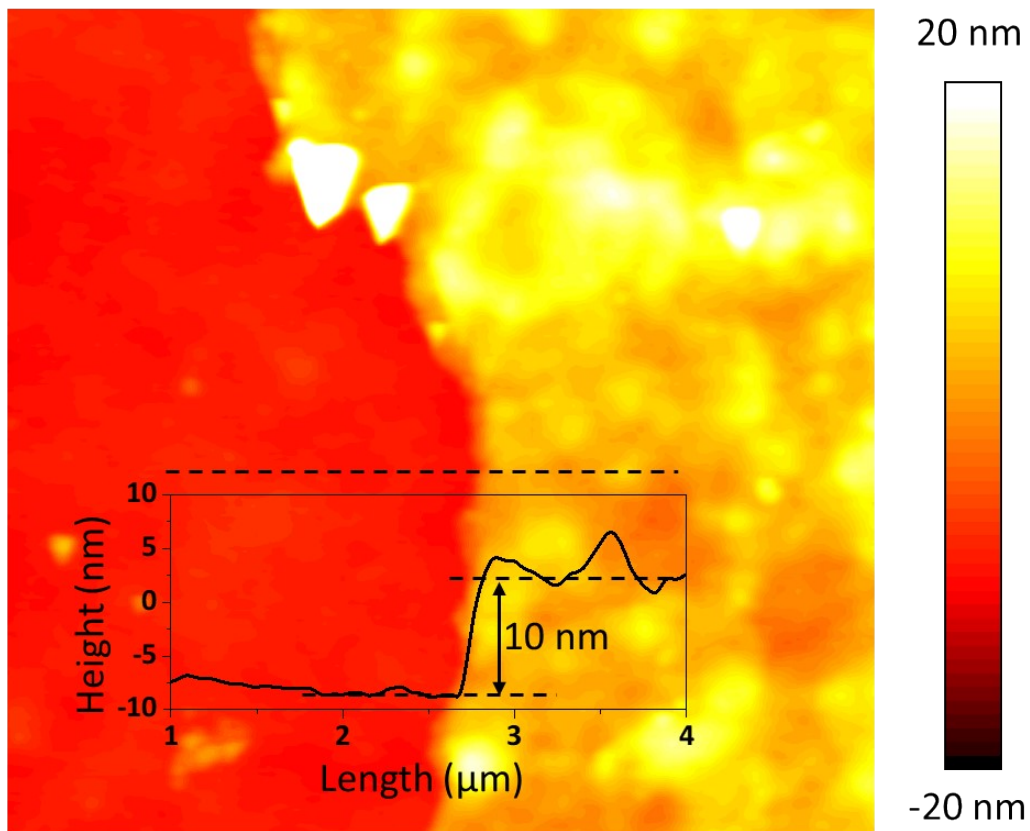

**Fig. S21.** AFM image ( $5 \times 5 \mu\text{m}$ ) of edge area of the PAA+0.001MBAA+3LG hydrogel coating.

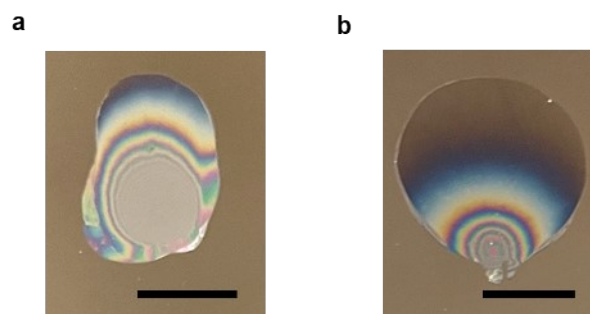

**Fig. S22.** Ultrathin hydrogel coatings prepared *via* blowing strategy using a) PAA+0.1 MBAA+3LG and b) PAA+0.01MBAA+3LG, respectively, and the near-transparency of the coating around edge area suggests the ultrathin thickness of the coating. The tensile stress-strain curves of the corresponding hydrogels are shown in Fig. 4f. The scale bars are 1 cm.

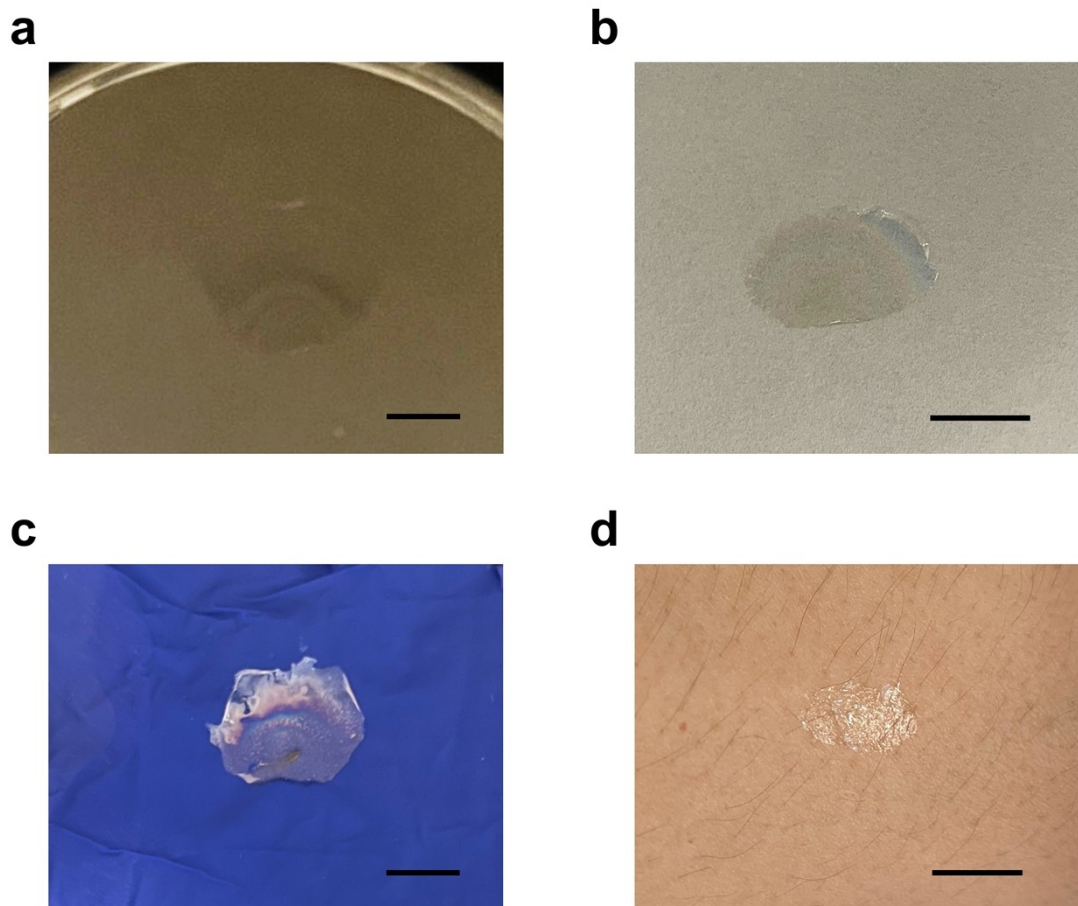

**Fig. S23.** Fabrication of 2AA-2LG hydrogel film using blowing strategy onto different substrates: a) PTFE, b) filter paper, c) rubber glove and d) human skin. The scale bars in Fig.s are 1 cm.



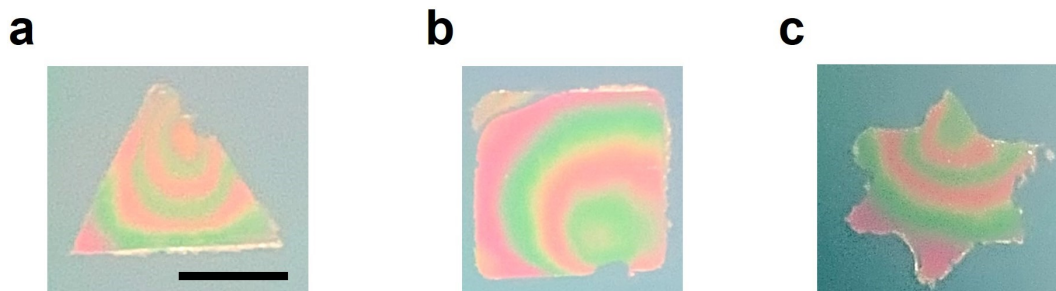

**Fig. S24.** Fabrication of 2AA-2LA hydrogel films with masking method into different shapes: a) triangle, b) square and c) hexagon onto silicon wafer. The scale bar in Fig. S24a is 1 cm.

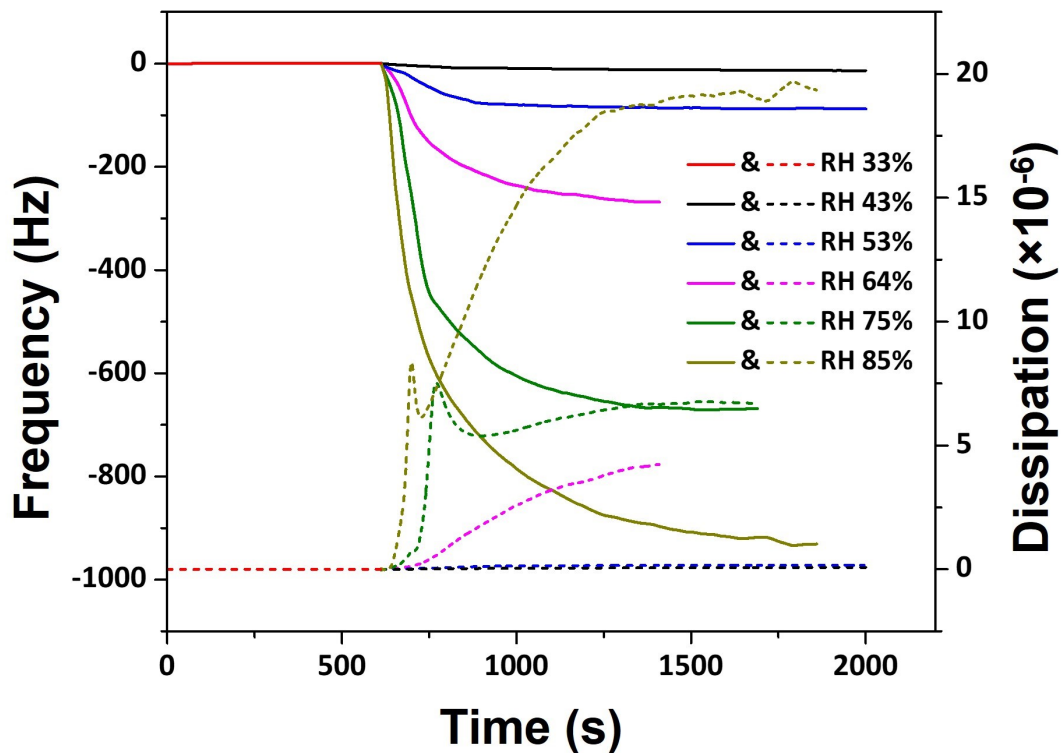

**Fig. S25** The change of frequency (solid lines) and dissipation (short dash lines) of a hydrogel coating on QCM-D sensor surface (fabricated at RH 33%) in ambient environments with different humidity levels. Red: RH 33%, black: RH 44%, blue: RH 53%, pink: RH 64%, green: RH 75% and dark yellow: RH 85%. The peaks observed in the dissipation change may result from the structural change due to too much adsorbed water in hydrogel coating.

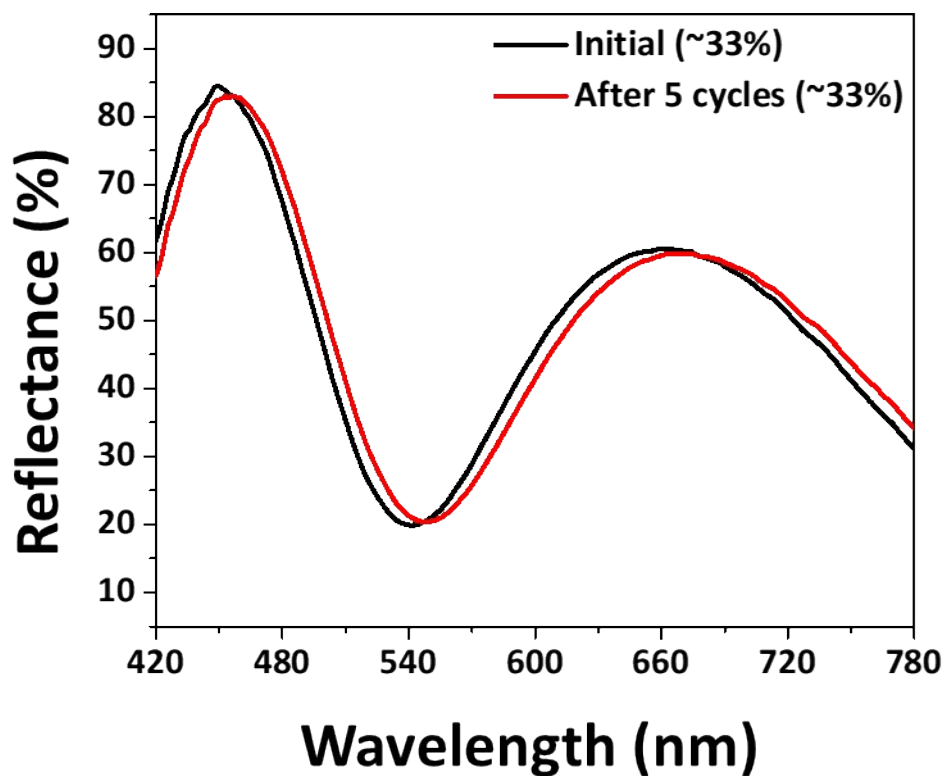

**Fig. S26.** The reflected spectra of the hydrogel coating after five cycles of swelling/deswelling by adsorbing/desorbing water from the ambient atmosphere. The spectra were collected from the white dot area shown in Fig. 5a and measured under an ambient condition of humidity ~33%,

**Table S1.** Polymer/Nanoparticle films/coatings fabricated by blowing polymer-dissolved solutions or nanoparticle suspensions.

| <b>Materials for Coating</b> | <b>Thickness</b> | <b>Preparation Method<sup>a</sup></b> | <b>Application</b> | <b>Ref.</b> |
|------------------------------|------------------|---------------------------------------|--------------------|-------------|
| Epoxy solution               | 200-500 nm       | Blowing+solvent evaporation           | Nanorod alignment  | 6           |
| Silk Solution                | > 150 nm         | Blowing+solvent evaporation           | Soft electronics   | 7           |
| TPE solution                 | > 90 nm          | Blowing+solvent evaporation           | Nano-membrane      | 8           |
| GO suspension                | >14.7 nm         | Blowing+solvent evaporation           | Conductive film    | 9           |

<sup>a</sup> Unlike the hydrogel coating proposed in this work, the solvent evaporation is a necessary step for the listed methods to transfer liquid films to solid or quasi-solid film.

**Table S2.** Comparison between the hydrogel coating fabricated using blowing strategy and the hydrogel coatings reported.

| Materials for Coating             | Thickness                          | Preparation Method <sup>a</sup>       | Ref.      |
|-----------------------------------|------------------------------------|---------------------------------------|-----------|
| Pre-gelated hydrogels             | > 5 nm                             | Blowing strategy                      | This work |
| NSD-Gel                           | > 800 $\mu\text{m}$                | Flaying from goat+nanoengineering     | 10        |
| PVA hydrogel                      | 0.5-600 $\mu\text{m}$              | Cryo-microtomy                        | 11        |
| Bacterial hydrogel                | 4-10 $\mu\text{m}$                 | Mechanical exfoliation                | 12        |
| P(SA-co-AAc) dissolved-solution   | 40-80 $\mu\text{m}$                | Solvent spreading+solvent evaporation | 13        |
| P2VP precursor solution           | 20-100 nm                          | Spin-coating+chemical crosslinking    | 14        |
| PAAm/SA-Ca <sup>2+</sup> hydrogel | > 20 $\mu\text{m}$                 | Renatured hydrogel painting           | 15        |
| PEGDA precursor solution          | $\sim 158 \pm 16$ nm               | Antigen-specific coating+LED          | 16        |
| P(AMSA-co-AA) precursor solution  | $\sim 300$ nm to 3.5 $\mu\text{m}$ | Spin-coating+UV                       | 17        |
| PDMAA precursor solution          | $\sim 10$ $\mu\text{m}$            | Submerging+UV                         | 18        |
| PDMS precursor solution           | 5-25 $\mu\text{m}$                 | Submerging+UV                         | 19        |
| PVPON/PMAA polymer solution       | > 43 nm                            | Submerging+solvent evaporation        | 20        |
| SA precursor solution             | $\sim 100$ nm                      | LbL submerging+ion crosslinking       | 21        |
| SA precursor solution             | > 3 nm                             | LbL submerging+ion crosslinking       | 22        |
| PEDGA precursor solution          | > 20 nm                            | Submerging+UV                         | 23        |
| HPMA precursor solution           | > 65 nm                            | Submerging+UV                         | 24        |
| Cellulose precursor solution      | $170 \pm 7$ nm                     | Spin-coating+chemical crosslinking    | 25        |
| PNIPAAm precursor solution        | $60 \pm 9.2$ $\mu\text{m}$         | Casting+ chemical crosslinking        | 26        |
| PVA solution                      | $\sim 20$ $\mu\text{m}$            | Casting+freeze-thawing                | 27        |

|                                           |           |                                               |    |
|-------------------------------------------|-----------|-----------------------------------------------|----|
| Fe <sup>3+</sup> -PAA precursor solution  | ~ 2mm     | Casting+crosslinking                          | 28 |
| CS/PEG precursor solution                 | ~ 150 nm  | Submerging+chemical crosslinking              | 29 |
| P(HEMA-co-AAc) precursor solution         | > 100 nm  | Spin-coating+UV                               | 30 |
| P(AAm-co-AAc-co-AAene) precursor solution | ~ 300 nm  | Spin-coating+UV                               | 31 |
| P(NIPAm-co-TMSPMA) precursor solution     | 2-20 μm   | Dipping/Brushing/Spraying+UV                  | 32 |
| PVA/TA precursor solution                 | ~ 1.9 μm  | Dipping/Brushing/Spraying+solvent evaporation | 33 |
| PEG-ACLT precursor solution               | ~7 μm     | Spraying+UV                                   | 34 |
| PAA precursor solution                    | ~ 600 nm  | Submerging+UV-                                | 35 |
| P(CBAA) precursor solution                | 15-150 nm | Submerging+chemical crosslinking              | 36 |
| PVA precursor solution                    | > 30 nm   | Dip-coating+chemical crosslinking             | 37 |
| PVA/Salicylic Acid                        | ~120 nm   | Spin-coating+freeze-thawing                   | 38 |
| ALG/CHI/HA precursor solution             | ~71 nm    | LbL submerging +chemical crosslinking         | 39 |
| PAAm precursor solution                   | > 2 μm    | Molding+UV                                    | 40 |
| PAAm+alginate precursor solution          | > 7 μm    | Cold-lamination+UV                            | 41 |
| PNIAAm+CS precursor solution              | ~500 μm   | Submerging+UV                                 | 42 |
| PDMS precursor solution                   | > 12.15μm | LbL spin-coating+thermal                      | 43 |

<sup>a</sup> For the preparation method, *ex-situ* methods are highlighted in grey, which refer to coating of already-gelated hydrogels. *In-situ* methods are highlighted in blue, which refer to locating hydrogel precursor solution on targeting surface, followed by curing step to obtain final hydrogel coating.

**Table S3.** Comparison between the thicknesses of the hydrogel coating measured using a commercial instrument Filmetrics and theoretical thicknesses calculated from wavelengths at constructive and destructive peaks in corresponding spectrum.

| Measured Thickness (nm) | Theoretical Thickness (nm) |
|-------------------------|----------------------------|
| 31                      | -                          |
| 53                      | -                          |
| 101                     | 119                        |
| 110                     | 131                        |
| 174                     | 169                        |
| 253                     | 248                        |
| 291                     | 266                        |
| 344                     | 314                        |
| 447                     | 418                        |

**Table S4.** Preparation of Ag/lignin NP solutions with different concentrations of Ag/lignin NPs.

| <b>Lignin<br/>Aqueous Solution<br/>(2.5 mL)</b> | <b>AgNO<sub>3</sub><br/>(mg)</b> | <b>5M<br/>NH<sub>3</sub>·H<sub>2</sub>O<br/>(mL)</b> | <b>DI Water<br/>(mL)</b> | <b>Abbreviation</b> |
|-------------------------------------------------|----------------------------------|------------------------------------------------------|--------------------------|---------------------|
| 0 mg/mL                                         | 0                                | 0.5                                                  | 2                        | Ag/0LG NP           |
| 10 mg/mL                                        | 15.75                            | 0.5                                                  | 2                        | Ag/1LG NP           |
| 20 mg/mL                                        | 31.5                             | 0.5                                                  | 2                        | Ag/2LG NP           |
| 30 mg/mL                                        | 47.25                            | 0.5                                                  | 2                        | Ag/3LG NP           |
| 40 mg/mL                                        | 63                               | 0.5                                                  | 2                        | Ag/4LG NP           |
| 50 mg/mL                                        | 78.75                            | 0.5                                                  | 2                        | Ag/5LG NP           |



**Table S5.** Preparation of Ag/lignin hydrogel using different Ag/LG NP solutions.

| <b>1 wt%<br/>APS<br/>(mL)</b> | <b>Ag/LG NP<br/>Solution (mL)</b> | <b>Other<br/>Materials (mg)</b> | <b>AA<br/>(mL)</b> | <b>5 w/v%<br/>CA/Water (mL)</b> | <b>Abbr.</b>  |
|-------------------------------|-----------------------------------|---------------------------------|--------------------|---------------------------------|---------------|
| 1                             | Ag/0LG NP,<br>2.5                 | -                               | 2                  | 1.5                             | 2AA-0LG       |
| 1                             | Ag/1LG NP,<br>2.5                 | -                               | 2                  | 1.5                             | 2AA-1LG       |
| 1                             | Ag/2LG NP,<br>2.5                 | -                               | 2                  | 1.5                             | 2AA-2LG       |
| 1                             | Ag/3LG NP,<br>2.5                 | -                               | 2                  | 1.5                             | 2AA-3LG       |
| 1                             | Ag/4LG NP,<br>2.5                 | -                               | 2                  | 1.5                             | 2AA-4LG       |
| 1                             | Ag/5LG NP,<br>2.5                 | -                               | 2                  | 1.5                             | 2AA-5LG       |
| 1                             | Ag/2LG NP,<br>2.5                 | -                               | 1.5                | 1.5                             | 1.5AA-2LG     |
| 1                             | Ag/2LG NP,<br>2.5                 | -                               | 1                  | 1.5                             | 1AA-2LG       |
| 1                             | Ag/2LG NP,<br>2.5                 | AAm, 400                        | 1                  | 1.5                             | P(AAm-co-AA)  |
| 1                             | Ag/2LG NP,<br>2.5                 | AMPS, 400                       | 1                  | 1.5                             | P(AA-co-AMPS) |
| 1                             | Ag/2LG NP,<br>2.5                 | SA, 400                         | 1                  | 1.5                             | PAA/SA        |

**Table S6.** Preparation of hydrogels polymerized using thermal initiator.

| 1 wt% APS (mL) | NP Suspension (mL)                  | Other Materials (mg) | AA (mL) | 5 w/v% Aqueous Solution (mL) | Abbr.                      |
|----------------|-------------------------------------|----------------------|---------|------------------------------|----------------------------|
| 1              | DI water, 2.5                       | -                    | 2       | DI Water, 1.5                | PAA                        |
| 1              | 10 mg/mL lignin particle, 2.5       | -                    | 2       | DI Water, 1.5                | PAA+1LG                    |
| 1              | 20 mg/mL lignin particle, 2.5       | -                    | 2       | DI Water, 1.5                | PAA+2LG                    |
| 1              | 30 mg/mL lignin particle, 2.5       | -                    | 2       | DI Water, 1.5                | PAA+3LG                    |
| 1              | 40 mg/mL lignin particle, 2.5       | -                    | 2       | DI Water, 1.5                | PAA+4LG                    |
| 1              | 20 mg/mL SiO <sub>2</sub> NP, 2.5   | -                    | 2       | 5 w/v% CA/Water, 1.5         | PAA+SiO <sub>2</sub>       |
| 1              | 20 mg/mL TiO <sub>2</sub> NP, 2.5   | -                    | 2       | 5 w/v% CA/Water, 1.5         | PAA+TiO <sub>2</sub>       |
| 1              | 20 mg/mL cellulose particle, 2.5    | -                    | 2       | 5 w/v% CA/Water, 1.5         | PAA+Cellulose              |
| 1              | 20 mg/mL H-SiO <sub>2</sub> NP, 2.5 | -                    | 2       | 5 w/v% CA/Water, 1.5         | PAA+H-SiO <sub>2</sub>     |
| 1              | DI water, 2.5                       | MBAA, 4.6            | 2       | DI Water, 1.5                | PAA+0.1MBAA <sup>a</sup>   |
| 1              | DI water, 2.5                       | MBAA, 0.46           | 2       | DI Water, 1.5                | PAA+0.01MBAA <sup>a</sup>  |
| 1              | DI water, 2.5                       | MBAA, 0.046          | 2       | DI Water, 1.5                | PAA+0.001MBAA <sup>a</sup> |

|   |                                     |                |   |                            |                                |
|---|-------------------------------------|----------------|---|----------------------------|--------------------------------|
| 1 | 30 mg/mL<br>lignin particle,<br>2.5 | MBAA,<br>4.6   | 2 | DI Water, 1.5              | PAA+0.1MBAA+3LG <sup>a</sup>   |
| 1 | 30 mg/mL<br>lignin particle,<br>2.5 | MBAA,<br>0.46  | 2 | DI Water, 1.5              | PAA+0.01MBAA+3LG <sup>a</sup>  |
| 1 | 30 mg/mL<br>lignin particle,<br>2.5 | MBAA,<br>0.046 | 2 | DI Water, 1.5              | PAA+0.001MBAA+3LG <sup>a</sup> |
| 1 | DI water, 2.5                       | AAM,<br>500    | - | 5 w/v%<br>CA/Water,<br>1.5 | PAAM                           |
| 1 | 5 mg/mL lignin<br>particle, 2.5     | AAM,<br>500    | - | 5 w/v%<br>CA/Water,<br>1.5 | PAAM+0.5LG                     |
| 1 | 10 mg/mL<br>lignin particle,<br>2.5 | AAM,<br>500    | - | 5 w/v%<br>CA/Water,<br>1.5 | PAAM+1LG                       |
| 1 | 20 mg/mL<br>lignin particle,<br>2.5 | AAM,<br>500    | - | 5 w/v%<br>CA/Water,<br>1.5 | PAAM+2LG                       |

<sup>a</sup> Numbers including 0.1, 0.01 and 0.001 before term “MBAA” stand for the mole ratio of MBAA to monomer AA in the hydrogel precursor solution.

## References

1. D. Gan, W. Xing, L. Jiang, J. Fang, C. Zhao, F. Ren, L. Fang, K. Wang and X. Lu, *Nat. Commun.*, 2019, **10**, 1-10.
2. W. Luo, L. Liu, G. Qi, F. Yang, X. Shi and X. Zhao, *Appl. Environ. Microbiol.*, 2019, **85**, e03128-03118.
3. X.-G. Sun, Y. Fang, X. Jiang, K. Yoshii, T. Tsuda and S. Dai, *Chem. Commun.*, 2016, **52**, 292-295.
4. R. Coşkun and A. Delibaş, *Polym. Bull. (Berlin)*, 2012, **68**, 1889-1903.
5. K. Somord, K. Somord, O. Suwantong, C. Thanomsilp, T. Peijs and N. Soykeabkaew, *Nanocomposites*, 2018, **4**, 102-111.
6. G. Yu, A. Cao and C. M. Lieber, *Nat. Nanotechnol.*, 2007, **2**, 372-377.
7. Q. Li, F. Bai, J. Sun, X. Zhou, W. Yuan, J. Lin, K.-Q. Zhang, G. Li and Z. Liu, *Nanoscale*, 2023.
8. X. Yang, L. Li, S. Wang, Q. Lu, Y. Bai, F. Sun, T. Li, Y. Li, Z. Wang and Y. Zhao, *Adv. Electron. Mater.*, 2020, **6**, 2000306.
9. W. Chen and L. Yan, *Advanced Materials (Deerfield Beach, Fla.)*, 2012, **24**, 6229-6233.
10. X. W. Zhongxue Bai, Manhui Zheng, Ouyang Yue, Mengchen Huang, Xiaoliang Zou, Boqiang Cui, Long Xie, Shuyin Dong, Jiaojiao Shang, Guidong Gong, Anna M. Blocki, Junling Guo, Xinhua Liu, *Adv. Funct. Mater.*, 2023, DOI: 10.1002/adfm.202212856, 202212856.
11. X. Fu, J. Li, C. Tang, S. Xie, X. Sun, B. Wang and H. Peng, *Adv. Funct. Mater.*, 2021, **31**, 2008355.
12. Z. Wu, S. Chen, R. Wu, N. Sheng, M. Zhang, P. Ji and H. Wang, *Chem. Eng. J.*, 2020, **391**, 123527.
13. Y. Tian, X. Wei, Z. J. Wang, P. Pan, F. Li, D. Ling, Z. L. Wu and Q. Zheng, *ACS Appl. Mater. Interfaces*, 2017, **9**, 34349-34355.
14. S. Singamaneni, M. E. McConney and V. V. Tsukruk, *Adv. Mater.*, 2010, **22**, 1263-1268.
15. Z. Yang, Y. He, S. Liao, Y. Ma, X. Tao and Y. Wang, *Sci. Adv.*, 2021, **7**, eabf9117.
16. J. L. Lilly, G. Romero, W. Xu, H. Y. Shin and B. J. Berron, *Biomacromol.*, 2015, **16**, 541-549.
17. M. He, Q. Wang, Z. Shi, Y. Xie, W. Zhao and C. Zhao, *Colloid Surf. B*, 2017, **158**, 518-526.
18. G. Parada, Y. Yu, W. Riley, S. Lojovich, D. Tshikudi, Q. Ling, Y. Zhang, J. Wang, L. Ling and Y. Yang, *Adv. Healthc. Mater.*, 2020, **9**, 2001116.
19. Y. Yu, H. Yuk, G. A. Parada, Y. Wu, X. Liu, C. S. Nabzdyk, K. Youcef-Toumi, J. Zang and X. Zhao, *Adv. Mater.*, 2019, **31**, 1807101.
20. V. Kozlovskaya, E. Kharlampieva, M. L. Mansfield and S. A. Sukhishvili, *Chem. Mater.*, 2006, **18**, 328-336.
21. Y. Xia, Z. Wang, L.-Y. Chen, S.-W. Xiong, P. Zhang, P.-G. Fu and J.-G. Gai, *Desalination*, 2020, **488**, 114510.
22. S. Gao, Y. Zhu, J. Wang, F. Zhang, J. Li and J. Jin, *Adv. Funct. Mater.*, 2018, **28**, 1801944.
23. S. Kim, W. Choi, D. J. Kim, H. S. Jung, D.-H. Kim, S.-H. Kim and S.-G. Park, *Nanoscale*, 2020, **12**, 12942-12949.
24. L. Witzdam, Y. L. Meurer, M. Garay-Sarmiento, M. Vorobii, D. Söder, J. Quandt, T. Haraszti and C. Rodriguez-Emmenegger, *Macromol. Biosci.*, 2022, **22**, 2200025.
25. Y. Dong, E. M. Akinoglu, H. Zhang, F. Maasoumi, J. Zhou and P. Mulvaney, *Adv. Funct. Mater.*, 2019, **29**, 1904290.
26. L. Wang, H. Liu, F. Zhang, G. Li and S. Wang, *Small*, 2016, **12**, 4697-4701.
27. J. Liu, S. Lin, X. Liu, Z. Qin, Y. Yang, J. Zang and X. Zhao, *Nat. Commun.*, 2020, **11**,

- 1071.
28. Q. Wang, X. Pan, C. Lin, X. Ma, S. Cao and Y. Ni, *Chem. Eng. J.*, 2020, **396**, 125341.
  29. L. Peng, L. Chang, M. Si, J. Lin, Y. Wei, S. Wang, H. Liu, B. Han and L. Jiang, *ACS Appl. Mater. Interfaces*, 2020, **12**, 9718-9725.
  30. M. Qin, M. Sun, R. Bai, Y. Mao, X. Qian, D. Sikka, Y. Zhao, H. J. Qi, Z. Suo and X. He, *Adv. Mater.*, 2018, **30**, 1800468.
  31. M. Sun, R. Bai, X. Yang, J. Song, M. Qin, Z. Suo and X. He, *Adv. Mater.*, 2018, **30**, 1804916.
  32. X. Yao, J. Liu, C. Yang, X. Yang, J. Wei, Y. Xia, X. Gong and Z. Suo, *Adv. Mater.*, 2019, **31**, 1903062.
  33. Z. Bai, K. Jia, C. Liu, L. Wang, G. Lin, Y. Huang, S. Liu and X. Liu, *Adv. Funct. Mater.*, 2021, **31**, 2104701.
  34. J. Yang, B. Xue, Y. Zhou, M. Qin, W. Wang and Y. Cao, *Adv. Mater. Technol.*, 2021, **6**, 2000911.
  35. Y. Liu, L. Wang, M. Zhang, D. Tu, X. Mao and Y. Liao, *IEEE Photon. Technol. Lett.*, 2007, **19**, 880-882.
  36. H. Huang, T. Kowalewski, E. E. Remsen, R. Gertzmann and K. L. Wooley, *J. Am. Chem. Soc.*, 1997, **119**, 11653-11659.
  37. D. Qin, Z. Liu, H. Bai, X. Song, Z. Li and D. D. Sun, *J. Membr. Sci.*, 2019, **592**, 117370.
  38. W. Wang, P. Lu, Y. Fan, L. Tian, S. Niu, J. Zhao and L. Ren, *Chem. Eng. J.*, 2019, **378**, 122173.
  39. D. Silva, H. C. de Sousa, M. H. Gil, L. F. Santos, G. M. Moutinho, M. Salema-Oom, C. Alvarez-Lorenzo, A. P. Serro and B. Saramago, *Int. J. Pharm.*, 2020, **585**, 119506.
  40. J. Choi, M. Hua, S. Y. Lee, W. Jo, C. Y. Lo, S. H. Kim, H. T. Kim and X. He, *Adv. Opt. Mater.*, 2020, **8**, 1901259.
  41. S. Cheng, Z. Lou, L. Zhang, H. Guo, Z. Wang, C. Guo, K. Fukuda, S. Ma, G. Wang and T. Someya, *Adv. Mater.*, 2023, **35**, 2206793.
  42. Y. Gao, X. Han, J. Chen, Y. Pan, M. Yang, L. Lu, J. Yang, Z. Suo and T. Lu, *Proc. Natl. Acad. Sci.*, 2021, **118**, e2103457118.
  43. Z. Wu, H. Ding, K. Tao, Y. Wei, X. Gui, W. Shi, X. Xie and J. Wu, *ACS Appl. Mater. Interfaces*, 2021, **13**, 21854-21864.
